# Supplementary material for: Assessment of Lethal, Sublethal, and Transgenerational Effects of Beauveria bassiana on the Demography of Aedes albopictus (Culicidae: Diptera)
Source: PubMed Central journal article supplement (PMC7143237; doi:10.3390/insects11030178), 2020-03-11
Supplement: insects-11-00178-s001.pdf [file insects-11-00178-s001.pdf]

Article

# Assessment of Lethal, Sublethal, and Transgenerational Effects of *Beauveria Bassiana* on the Demography of *Aedes Albopictus* (Culicidae: Diptera)

Rana Fartab Shoukat <sup>1,†</sup>, Junaid Zafar <sup>1,†</sup>, Muhammad Shakeel <sup>1</sup>, Yuxin Zhang <sup>1</sup>, Shoaib Freed <sup>2</sup>, Xiaoxia Xu <sup>1</sup>, and Fengliang Jin <sup>1,\*</sup>

Supplementary

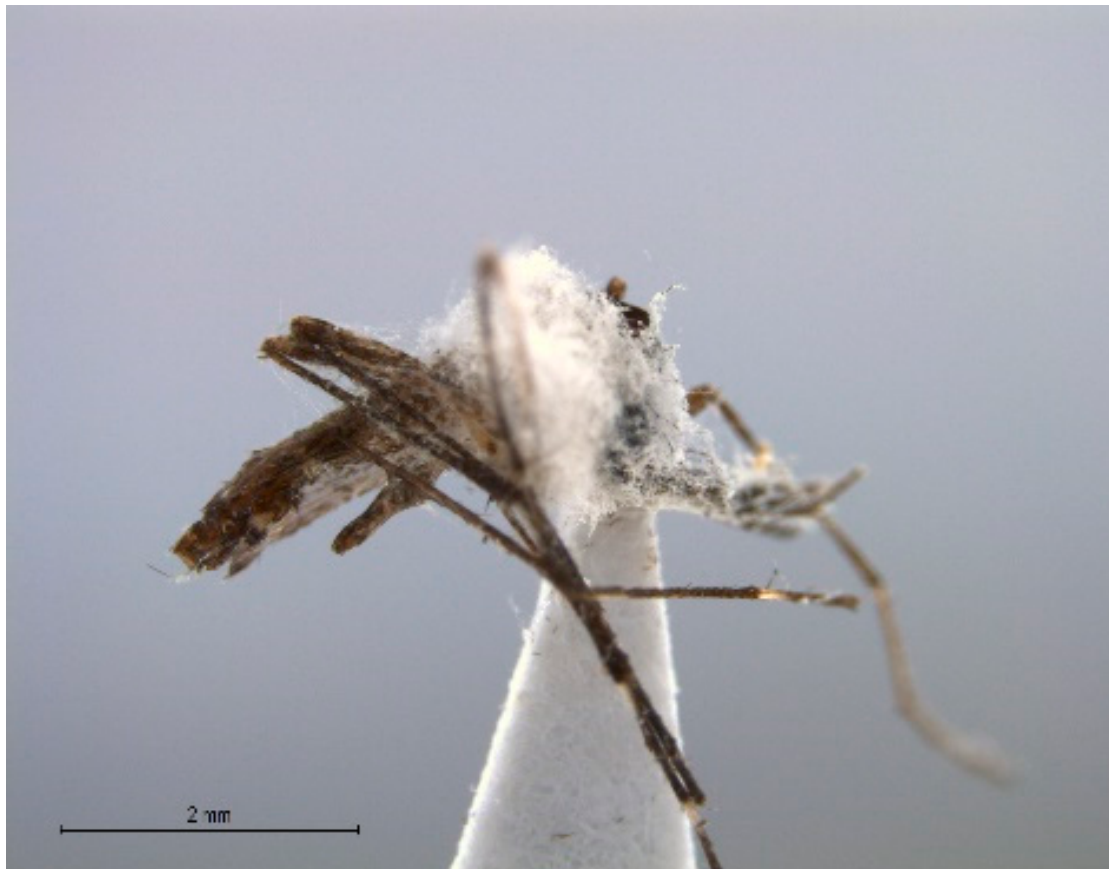

**Figure S1.** Fungal growth of *Beauveria bassiana* isolate Bb-01 on adult *Aedes albopictus* (Culicidae: Diptera). .

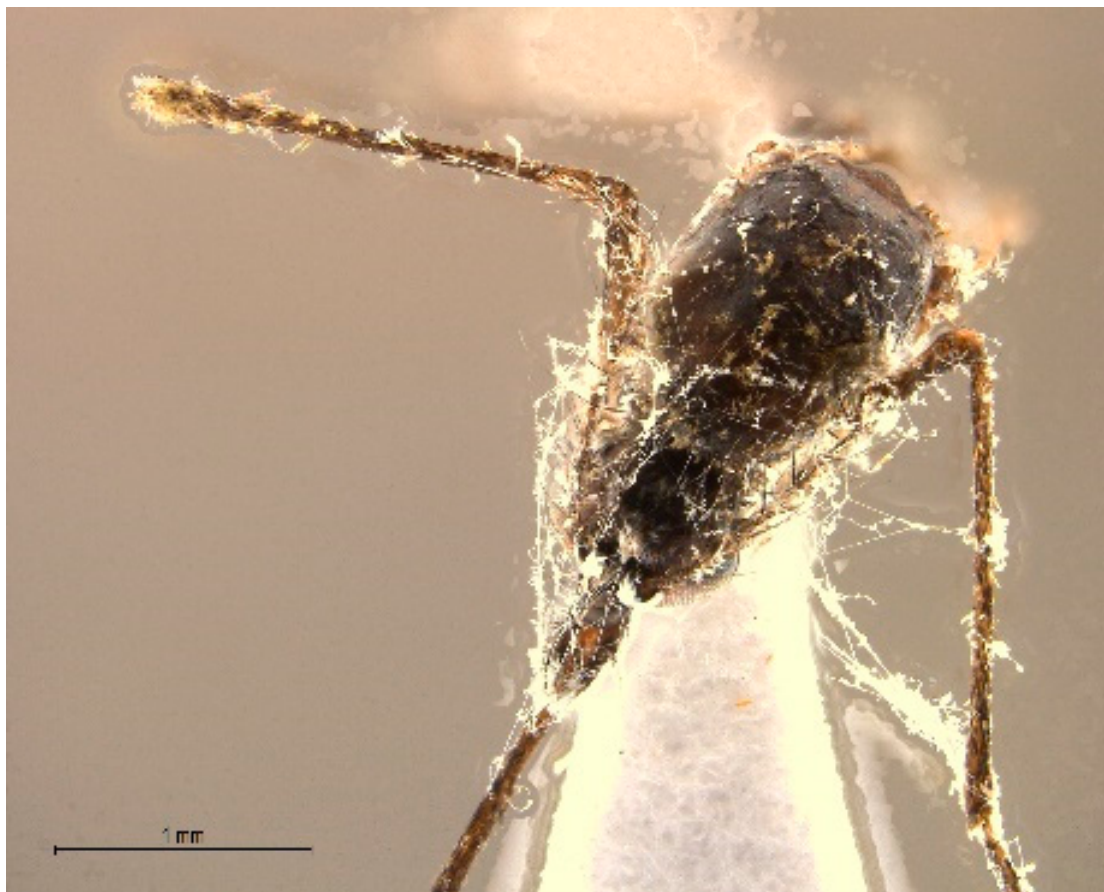

**Figure S2.** Fungal growth of *Beauveria bassiana* isolate Bb-10 on adult *Aedes albopictus* (Culicidae: Diptera).

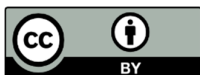

© 2020 by the authors. Submitted for possible open access publication under the terms and conditions of the Creative Commons Attribution (CC BY) license (<http://creativecommons.org/licenses/by/4.0/>).
